# Supplementary material for: Probing the initiation of voltage decay in Li-rich layered cathode materials at the atomic scale
Source: Royal Society of Chemistry journal article supplement (doi:10.1039/c4ta06856d), 2015-01-01
Supplement: c4ta06856d1.pdf [file c4ta06856d1.pdf]

## Supporting Information

# Probing the Origin of Voltage Decay in Li-Rich Layered Cathode Materials at Atomic Scale

*Yan Wu,<sup>\*,†,‡</sup> Cheng Ma,<sup>§,‡</sup> Jihui Yang,<sup>†</sup> Zicheng Li,<sup>⊥</sup> Lawrence F. Allard,<sup>§</sup> Chengdu Liang<sup>§</sup> and Miaofang Chi<sup>\*,§</sup>*

<sup>†</sup>General Motors Global R&D Center, 30500 Mound Rd. Warren, Michigan 48090, United States

<sup>§</sup>Center for Nanophase Materials Sciences, Oak Ridge National Laboratory, Oak Ridge, Tennessee 37831, United States

<sup>†</sup>Department of Materials Science & Engineering, University of Washington, Seattle, Washington 98195, United States

<sup>⊥</sup>Optimal, Inc., Plymouth, Michigan 48170, United States

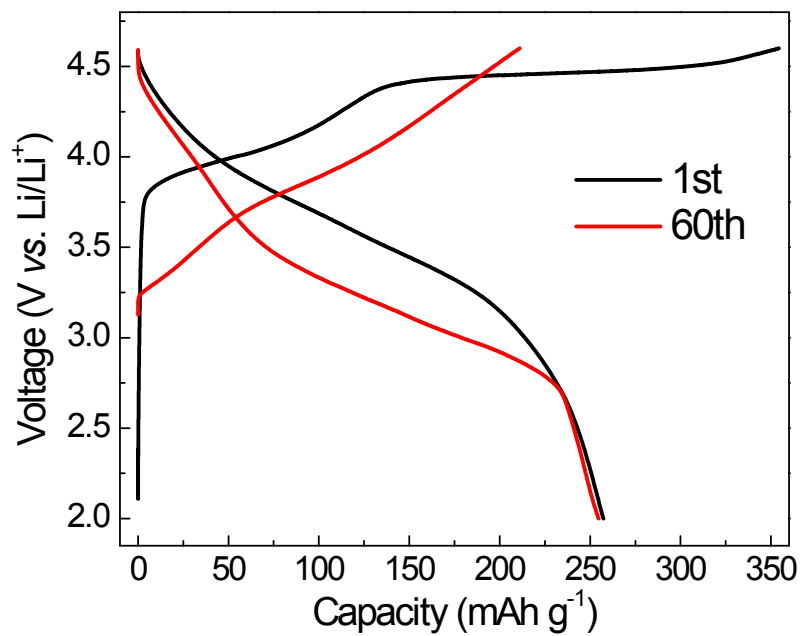

**Figure S1.** Voltage profiles of the 1<sup>st</sup> and 60<sup>th</sup> cycles between 2 and 4.8 V at C/100. The charge and discharge from the 2<sup>nd</sup> to 59<sup>th</sup> cycle were performed at C/10.

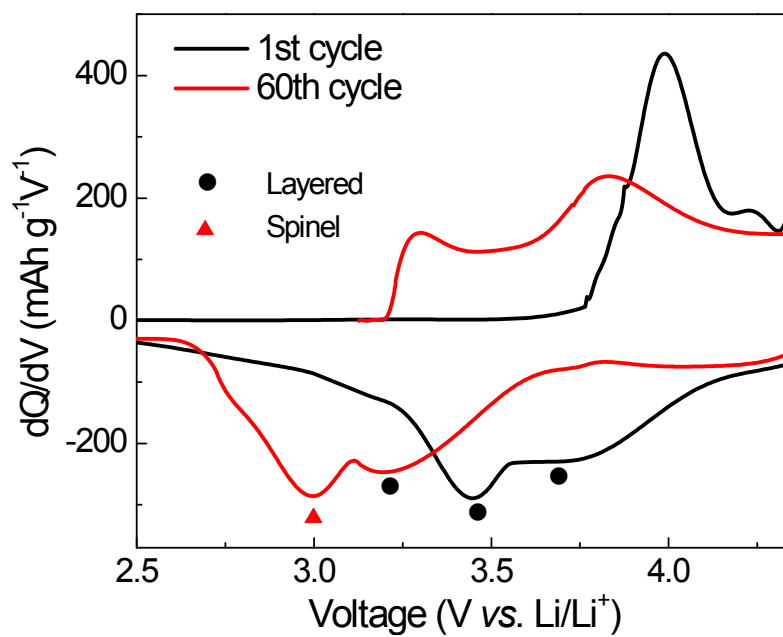

**Figure S2.**  $dQ/dV$  plots of the 1<sup>st</sup> and 60<sup>th</sup> cycle between 2 and 4.8 V at C/100. The charge and discharge from the 2<sup>nd</sup> to 59<sup>th</sup> cycle were performed at C/10.

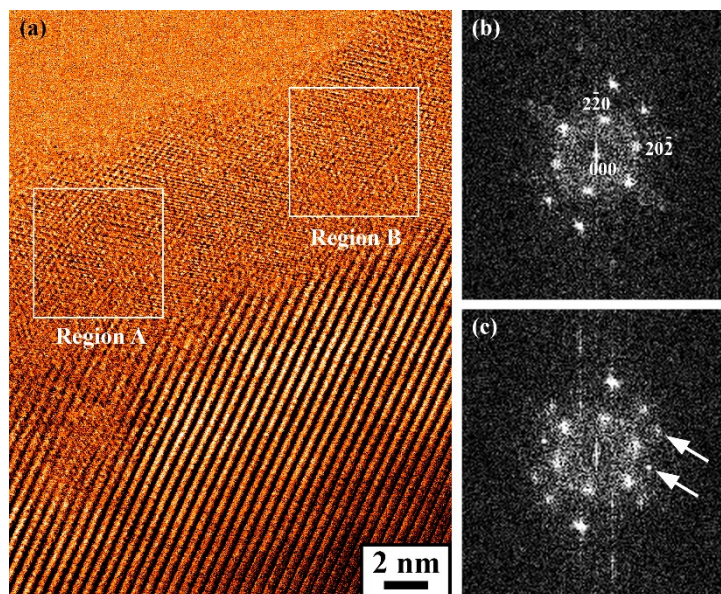

**Figure S3.** (a) BF-STEM image of a particle after 18 cycles between 2 and 4.8 V. (b) FFT pattern from region A. (c) FFT pattern from region B.

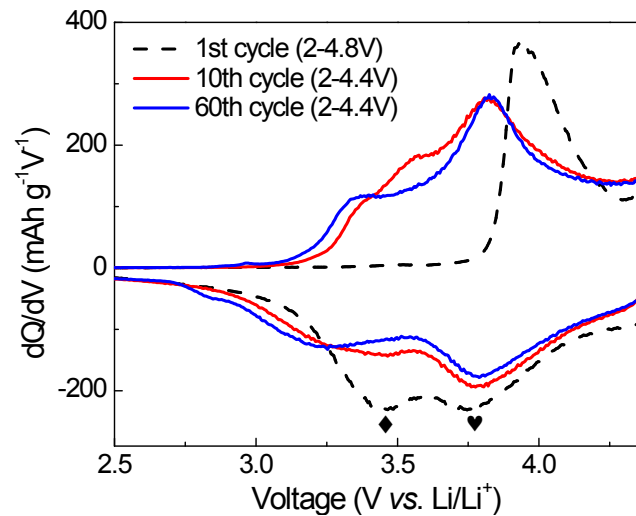

**Figure S4.**  $dQ/dV$  plots of the 2-4.4 V cycled specimen after charging to 4.8 V in the initial cycle. The cycling was performed at C/10. The  $\text{Co}^{4+/3+}/\text{Ni}^{4+/3+/2+}$  and  $\text{Mn}^{4+/3+}$  reduction peaks of the layered phase are marked in the discharge curve with ♥ and ♦, respectively.
